# Supplementary material
Source: PubMed Central journal article supplement (PMC4284407)

**Appendix**

**Supplemental Tables 1-2**

**Supplemental Figure Legend**

**Supplemental Figure 1**

**Supplemental Table 1a. Correlation matrix of urine biomarker-creatinine ratios in HIV-infected women.**

|              | <b>α1m</b> | <b>IL-18</b> | <b>KIM-1</b> | <b>NGAL</b> | <b>ACR</b> |
|--------------|------------|--------------|--------------|-------------|------------|
| <b>α1m</b>   | 1          | 0.225**      | 0.301**      | 0.209**     | 0.421**    |
| <b>IL-18</b> |            | 1            | 0.162**      | 0.232**     | 0.148**    |
| <b>KIM-1</b> |            |              | 1            | 0.124*      | 0.177**    |
| <b>NGAL</b>  |            |              |              | 1           | 0.248**    |
| <b>ACR</b>   |            |              |              |             | 1          |

All biomarkers are standardized to urine creatinine.

Note: \*p<0.001 and \*\*p<0.0001 denote statistical significance of Spearman correlations.

Abbreviations: α1m, α1-microglobulin; ACR, albumin-to-creatinine ratio; IL-18, interleukin-18; KIM-1, kidney injury molecule-1; NGAL, neutrophil gelatinase-associated lipocalin.

**Supplemental Table 1b. Correlation matrix of urine biomarker concentrations in HIV-infected women.**

|              | <b>α1m</b> | <b>IL-18</b> | <b>KIM-1</b> | <b>NGAL</b> | <b>ACR</b> | <b>UCR</b> |
|--------------|------------|--------------|--------------|-------------|------------|------------|
| <b>α1m</b>   | 1          | 0.416**      | 0.396**      | 0.279**     | 0.211**    | 0.409**    |
| <b>IL-18</b> |            | 1            | 0.495**      | 0.438**     | -0.018     | 0.642**    |
| <b>KIM-1</b> |            |              | 1            | 0.343**     | 0.014      | 0.577**    |
| <b>NGAL</b>  |            |              |              | 1           | 0.119*     | 0.410**    |
| <b>ACR</b>   |            |              |              |             | 1          | -0.181*    |
| <b>UCR</b>   |            |              |              |             |            | 1          |

Biomarkers are not standardized to urine creatinine, with exception of ACR.

Note: \*p<0.001 and \*\*p<0.0001 denote statistical significance of Spearman correlations.

Abbreviations: α1m, α1-microglobulin; ACR, albumin-to-creatinine ratio; IL-18, interleukin-18; KIM-1, kidney injury molecule-1; NGAL, neutrophil gelatinase-associated lipocalin; UCR, urine creatinine.

**Supplemental Table 2. Associations of urine  $\alpha$ 1m concentration<sup>1</sup> with kidney function decline and mortality in HIV-infected women.**

| Range of $\alpha$ 1m                                 | Incident CKD |                                |                                | 10% decline in eGFR <sub>Cys</sub> |                                |                                | All-cause mortality |                                  |                                  |
|------------------------------------------------------|--------------|--------------------------------|--------------------------------|------------------------------------|--------------------------------|--------------------------------|---------------------|----------------------------------|----------------------------------|
|                                                      | C1<br>-      | C2<br>0.6-1.4 mg/dl            | C3<br>>1.4 mg/dl               | C1<br>-                            | C2<br>0.6-1.4 mg/dl            | C3<br>>1.4 mg/dl               | C1<br>-             | C2<br>0.6-1.4 mg/dl              | C3<br>>1.4 mg/dl                 |
| <b>No. at risk</b>                                   | 343          | 259                            | 217                            | 358                                | 274                            | 271                            | 358                 | 274                              | 271                              |
| <b>No. events</b>                                    | 48           | 54                             | 75                             | 9                                  | 18                             | 34                             | 29                  | 30                               | 69                               |
|                                                      |              | <b>Risk Ratio<br/>(95% CI)</b> | <b>Risk Ratio<br/>(95% CI)</b> |                                    | <b>Risk Ratio<br/>(95% CI)</b> | <b>Risk Ratio<br/>(95% CI)</b> |                     | <b>Hazard Ratio<br/>(95% CI)</b> | <b>Hazard Ratio<br/>(95% CI)</b> |
| <b>Demographic Adjusted<sup>2</sup></b>              | Ref          | 1.59 (0.78, 3.21)              | 3.09 (1.80, 5.32)              | Ref                                | 2.62 (1.20, 5.74)              | 4.58 (2.23, 9.41)              | Ref                 | 1.32 (0.79, 2.20)                | 3.01 (1.93, 4.68)                |
| <b>Multivariate Adjusted<sup>3</sup></b>             | ---          | 1.28 (0.71, 2.30)              | 2.21 (1.33, 3.69)              | ---                                | 2.23 (1.03, 4.86)              | 3.01 (1.42, 6.38)              | ---                 | 1.16 (0.69, 1.95)                | 1.95 (1.24, 3.08)                |
| <b>Adjusted +ACR<sup>4</sup></b>                     | ---          | 1.27 (0.72, 2.24)              | 2.02 (1.23, 3.31)              | ---                                | 2.31 (1.08, 4.93)              | 2.80 (1.29, 6.08)              | ---                 | 1.14 (0.68, 1.93)                | 1.92 (1.21, 3.04)                |
| <b>Adjusted +ACR, IL-18, KIM-1, NGAL<sup>5</sup></b> | ---          | 1.16 (0.68, 1.96)              | 1.70 (1.09, 2.64)              | ---                                | 2.21 (1.02, 4.78)              | 2.28 (1.03, 5.03)              | ---                 | 1.06 (0.61, 1.84)                | 1.64 (0.94, 2.87)                |

<sup>1</sup>Stratified by categories. Category 1 comprises all participants with undetectable urine  $\alpha$ 1m. All analyses use Category 1 as reference category.

<sup>2</sup>Adjusted for age and race.

<sup>3</sup>Adjusted for age, race, baseline eGFR<sub>Cys</sub>, hypertension, diabetes mellitus, hepatitis C virus infection, HIV viral load, CD4 lymphocyte count, antiretroviral therapy use, and serum albumin.

<sup>4</sup>Adjusted for all covariates listed above with addition of albumin-creatinine ratio.

<sup>5</sup>Adjusted for all covariates listed above with addition of albumin-creatinine ratio, interleukin-18, kidney injury molecule-1, neutrophil gelatinase-associated lipocalin, and liver fatty acid binding protein.

*Abbreviations:* ACR, albumin-creatinine ratio;  $\alpha$ 1m,  $\alpha$ 1-microglobulin concentration; C1, Category 1; C2, Category 2; C3, Category 3; CI, confidence interval; CKD, chronic kidney disease; eGFR<sub>Cys</sub>, cystatin C-based estimated glomerular filtration rate; IL-18, interleukin-18; KIM-1, kidney injury molecule-1; NGAL, neutrophil gelatinase-associated lipocalin; Ref, reference category.

## Supplemental Figure Legend

**Supplemental Figure 1.** Magnitudes of associations of urinary biomarker concentrations with annual eGFR<sub>Cys</sub> change. All estimates derived from multivariate models comparing Category 3 with Category 1 for α1m, and highest with lowest tertile for ACR, IL-18, KIM-1, and NGAL. Multivariate models adjust for age, race, traditional kidney disease risk factors, HIV-related factors, and all displayed biomarkers. Results reported as eGFR<sub>Cys</sub> change in ml/min/1.73m<sup>2</sup> per year (95% confidence interval).

Supplemental Figure 1.

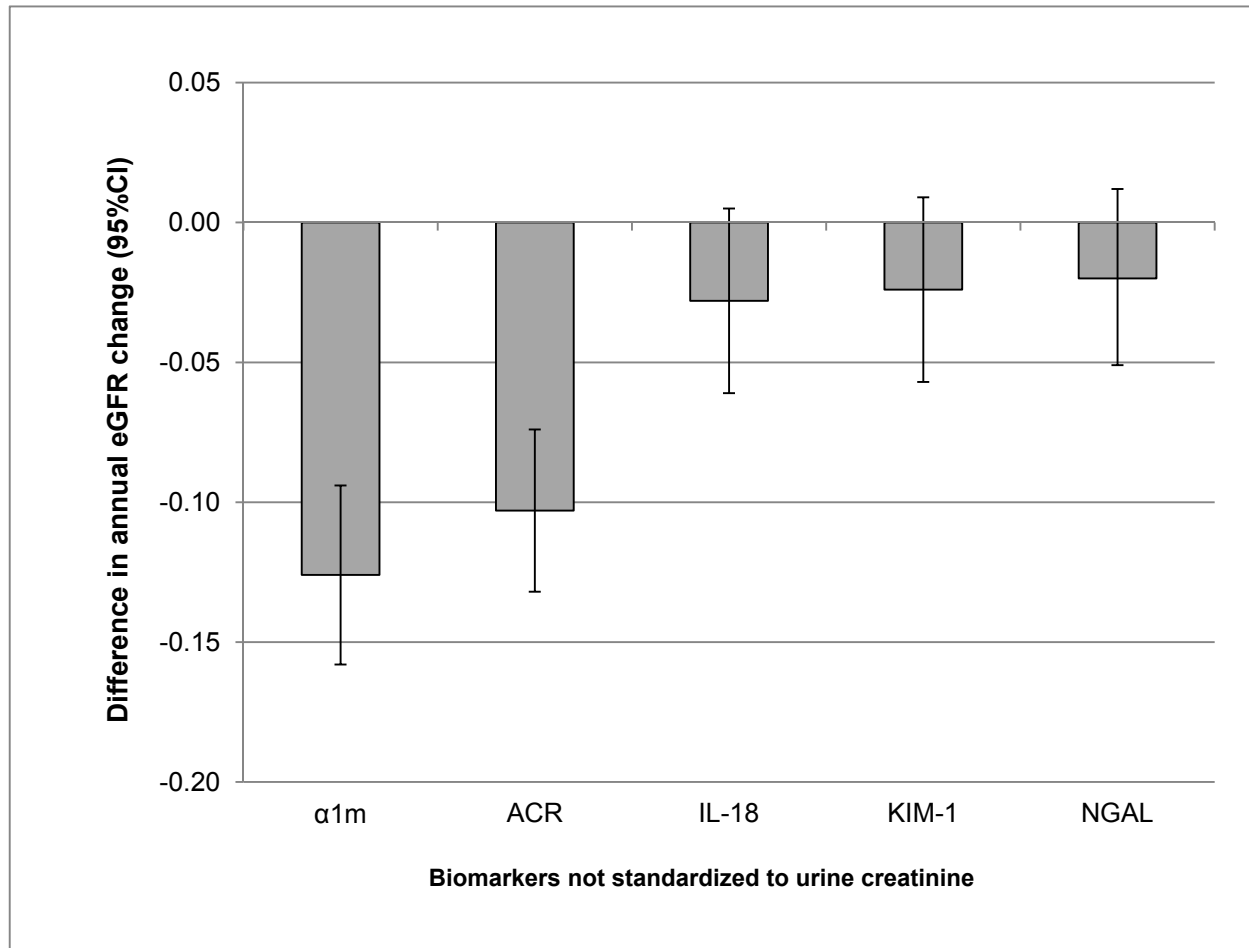

Supplement: CJN.03220314_CJN03220314SupplementaryData2.pdf [file CJN.03220314_CJN03220314SupplementaryData2.pdf]
