# Supplementary material
Source: PubMed Central journal article supplement (PMC4284407)
Supplement: CJN.03220314_CJN03220314SupplementaryData1.pdf [file CJN.03220314_CJN03220314SupplementaryData1.pdf]

**Original Article: Association of urine  $\alpha$ 1-microglobulin with kidney function decline and mortality in HIV-infected women**

**Authors:** Vasantha Jotwani<sup>1,2</sup>, Rebecca Scherzer<sup>1,2</sup>, Alison Abraham<sup>3</sup>, Michelle M Estrella<sup>4</sup>, Michael Bennett<sup>5</sup>, Mardge H Cohen<sup>6</sup>, Marek Nowicki<sup>7</sup>, Anjali Sharma<sup>8</sup>, Mary Young<sup>9</sup>, Phyllis C Tien<sup>1</sup>, Joachim H Ix<sup>10, 11</sup>, Mark J Sarnak<sup>12</sup>, Chirag R Parikh<sup>13,14</sup>, Michael G Shlipak<sup>1,2</sup>

<sup>1</sup>Department of Medicine, San Francisco VA Medical Center, San Francisco, USA

<sup>2</sup>Department of Epidemiology and Biostatistics, University of California, San Francisco, USA

<sup>3</sup>Department of Epidemiology, Johns Hopkins Bloomberg School of Public Health, Baltimore, USA

<sup>4</sup>Department of Medicine, Johns Hopkins School of Medicine, Baltimore, USA

<sup>5</sup>Division of Nephrology and Hypertension, Cincinnati Children's Hospital Medical Center, Cincinnati, USA

<sup>6</sup>Departments of Medicine, Stroger Hospital and Rush University, Chicago, USA

<sup>7</sup>Department of Medicine, University of Southern California, Los Angeles, USA

<sup>8</sup>Division of Infectious Diseases, Department of Medicine, SUNY Downstate Medical Center, Brooklyn, USA

<sup>9</sup>Division of Infectious Diseases and Travel Medicine, Department of Medicine, Georgetown University Medical Center, Washington, D.C., USA

<sup>10</sup>Division of Nephrology-Hypertension, Department of Medicine, University of California, San Diego, USA

<sup>11</sup>Nephrology Section, Veterans Affairs San Diego Healthcare System, USA

<sup>12</sup>Division of Nephrology, Tufts Medical Center, Boston, USA

<sup>13</sup>Section of Nephrology, Department of Medicine, Yale University, New Haven, USA

<sup>14</sup>Program of Applied Translational Research, Yale University, New Haven, USA
